# Supplementary material for: Characterizing sources of high surface ozone events in the southwestern US with intensive field measurements and two global models
Source: Copernicus journal article supplement (doi:10.5194/acp-20-10379-2020), 2020-09-08
Supplement: Supplementary file 1 [file acp-20-10379-2020-supplement.pdf]

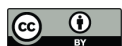

*Supplement of*

**Characterizing sources of high surface ozone events in the southwestern US with intensive field measurements and two global models**

**Li Zhang et al.**

*Correspondence to:* Li Zhang (alex.zhang@noaa.gov)

The copyright of individual parts of the supplement might differ from the CC BY 4.0 License.

This document contains Figures S1 to S14 and Table S1 to S6 not included in the main article.

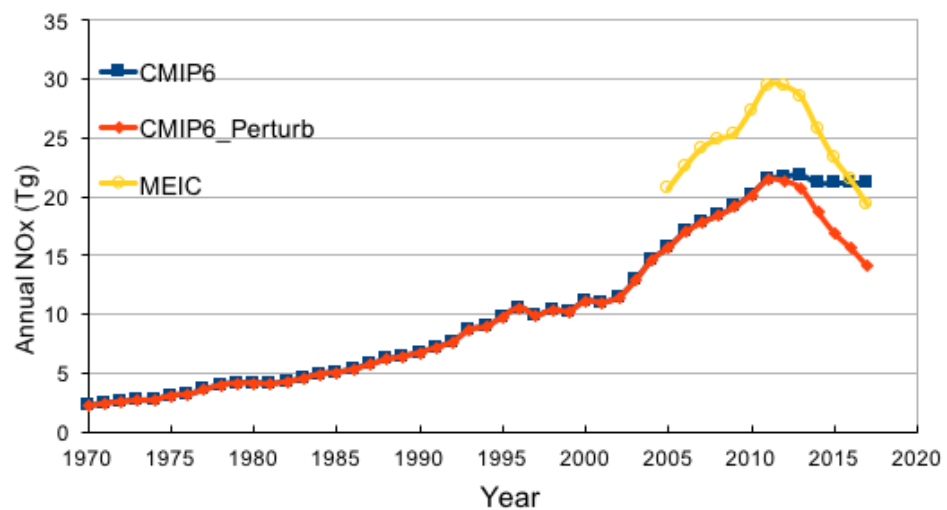

**Figure S1.** NO<sub>x</sub> emission trends over China as estimated in the CMIP6 inventory (blue) and in MEIC (Multi-resolution Emission Inventory for China, yellow). The red line shows adjusted NO<sub>x</sub> emissions used in this study.

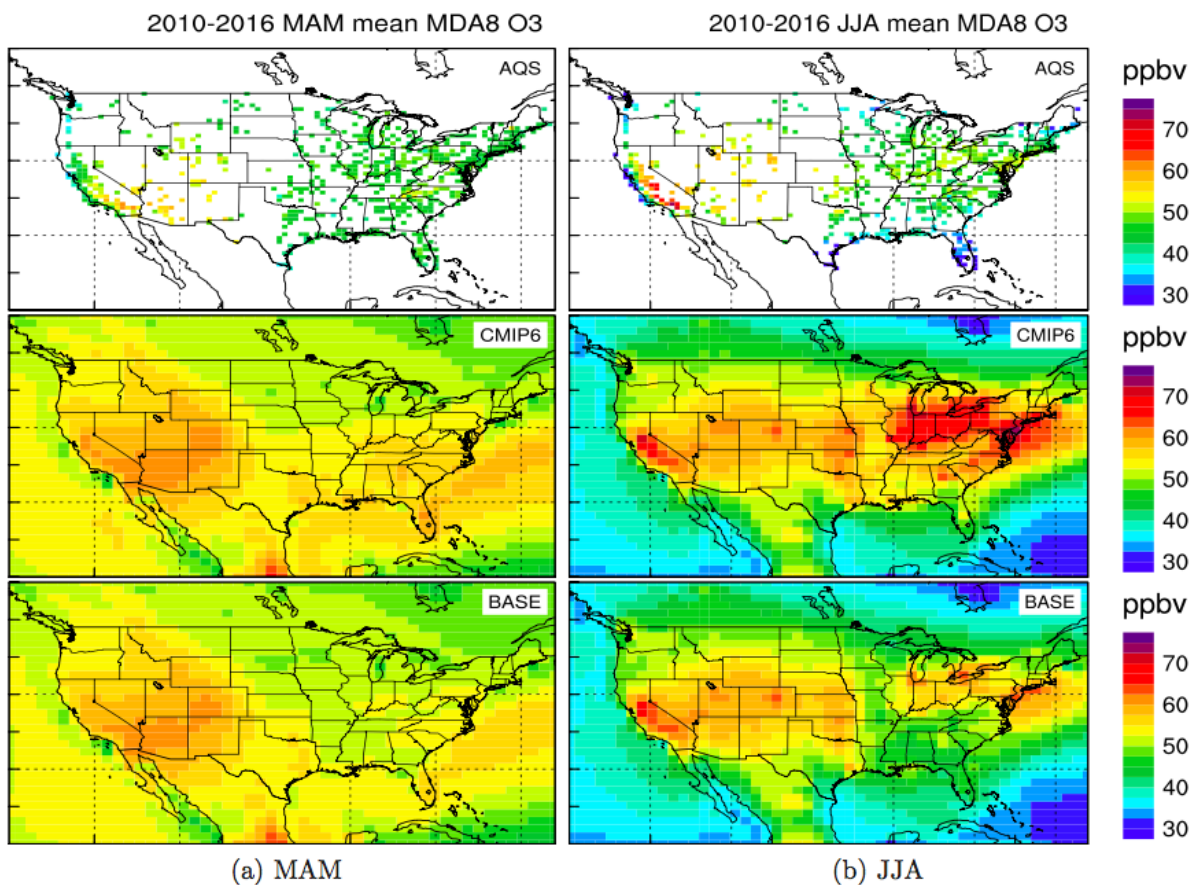

**Figure S2.** Spring (MAM) and summertime (JJA) mean MDA8 O<sub>3</sub> over the continental U.S. during 2010-2016 from AQS observations (top panels), GFDL-AM4 simulations with original CMIP6 emissions (middle panels) and adjusted emissions over the U.S. and China as described in the text (bottom panels). Observations at AQS sites are gridded into  $0.5^\circ \times 0.625^\circ$ .

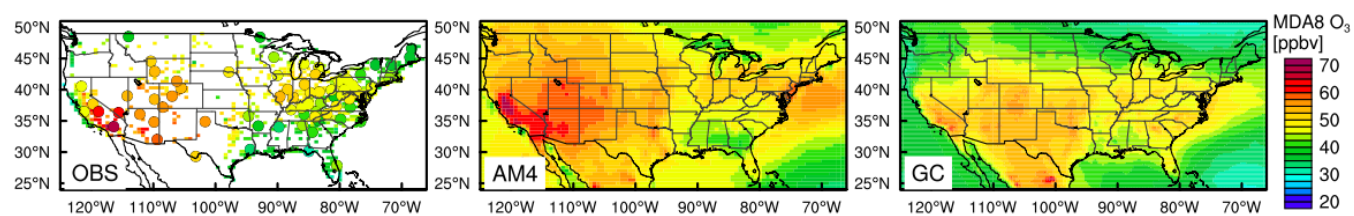

**Figure S3.** Spatial distributions of mean MDA8 O<sub>3</sub> during FAST-LVOS (May-June, 2017) as observed (OBS) and simulated with GFDL-AM4 (AM4) and GEOS-Chem (GC).

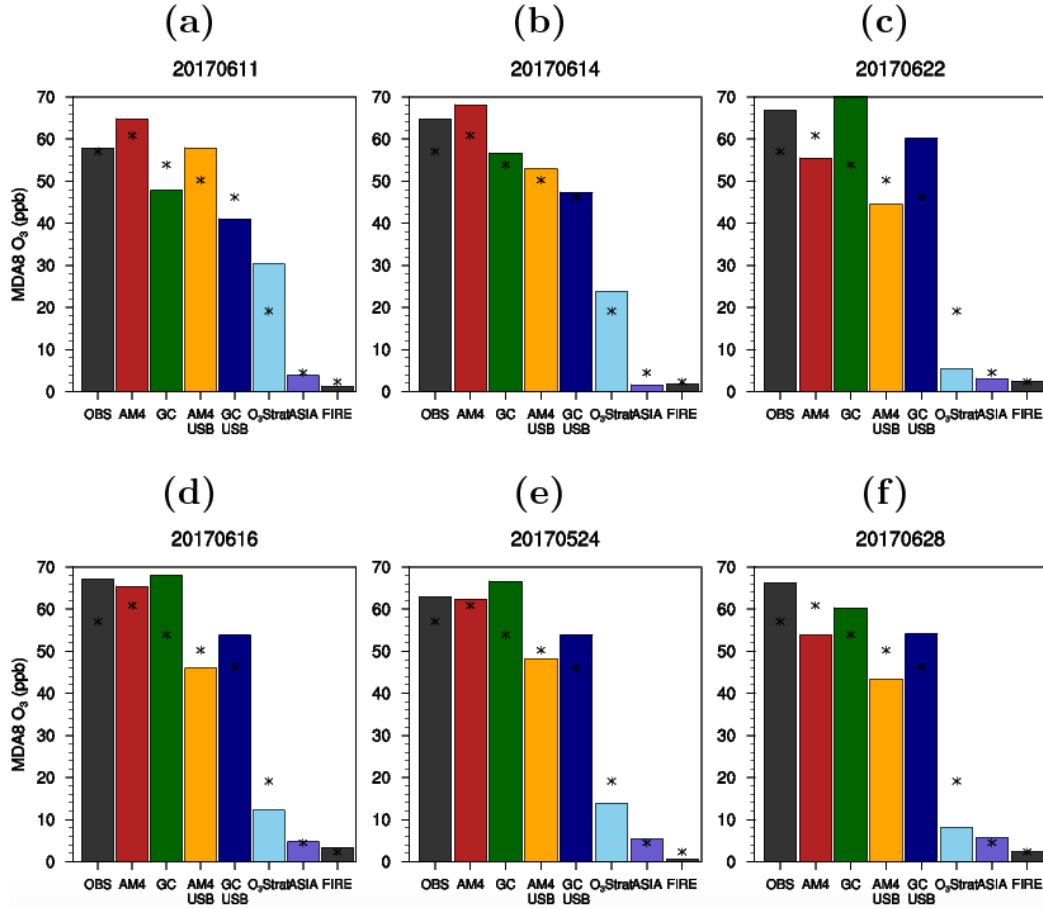

**Figure S4.** Statistics of MDA8 O<sub>3</sub> at 12 low-elevation (<1000 m altitude) air quality monitoring sites in the Las Vegas Valley as observed (OBS) and simulated with GFDL-AM4 (AM4) and GEOS-Chem (GC), along with USB O<sub>3</sub> from the two models, and contributions from stratospheric O<sub>3</sub> (O<sub>3</sub>Strat), Asian pollution (ASIA), and wildfires (FIRE) estimated with GFDL-AM4 on (a) June 11, (b) June 14, (c) June 22, (d) June 16, (e) May 24, and (f) June 28, 2017. The star markers denote the mean values during the entire FAST-LVOS period (May-June, 2017).

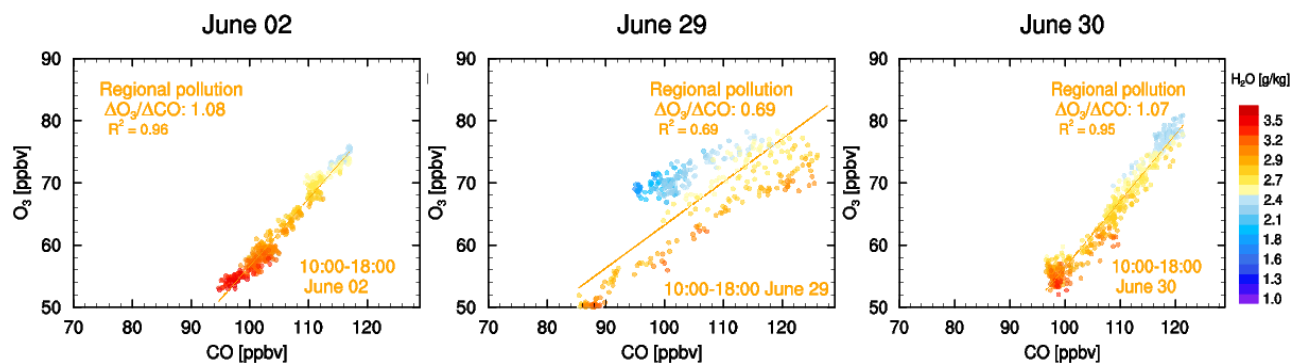

**Figure S5.** Scatter plots of 1-min  $O_3$  against CO measured at Angel Peak, color-coded by specific humidity, for air masses influenced by regional pollution on June 02, June 29, and June 30.

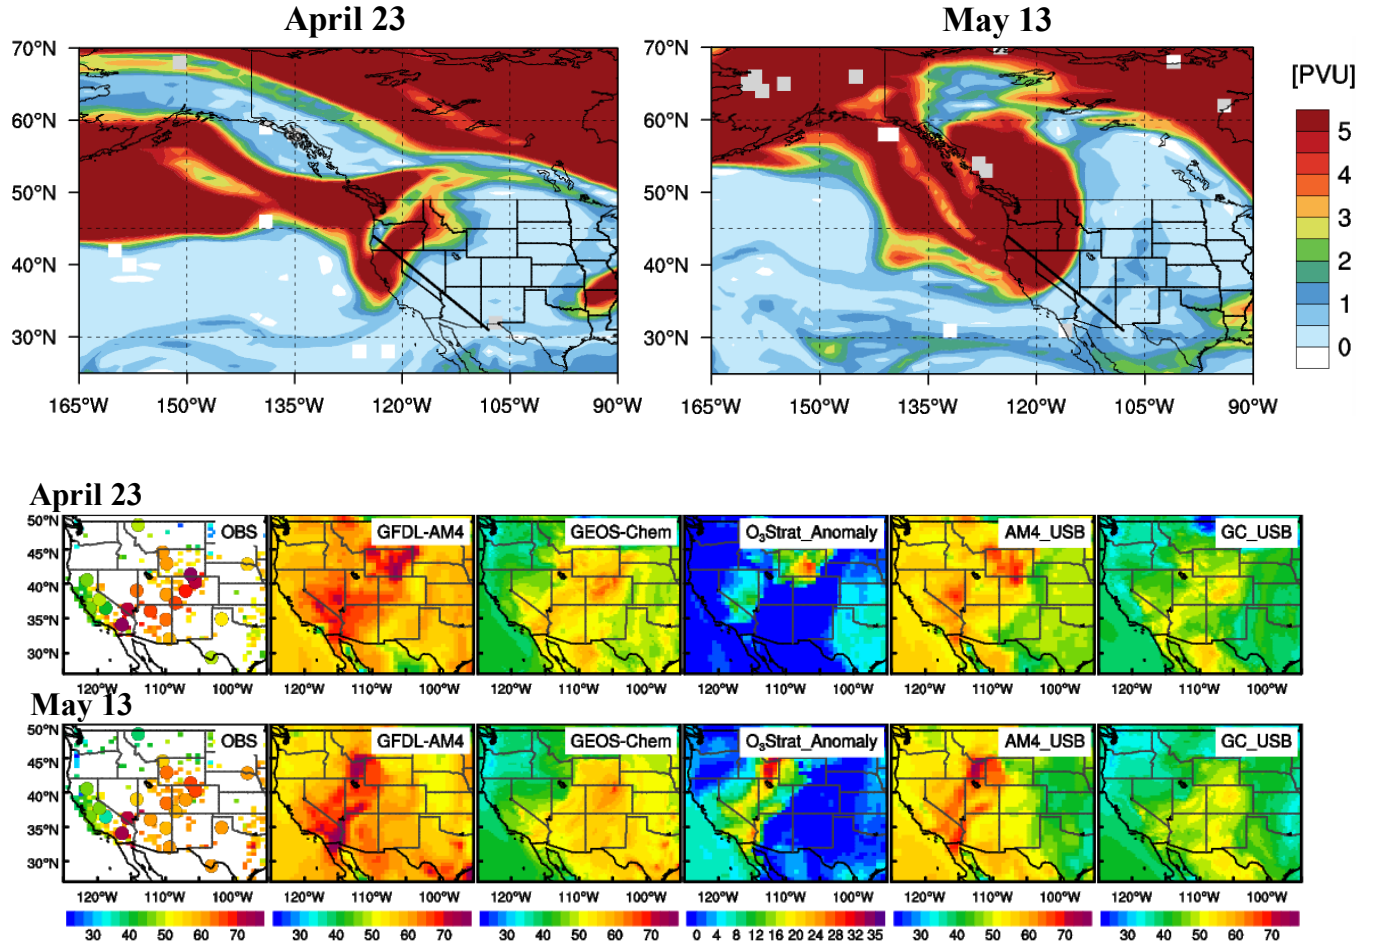

**Figure S6.** Top panels: Potential Vorticity at 250 hPa on April 23 and May 13 of 2017, calculated from the NCEP-FNL reanalysis data. Middle and bottom panels: maps of total MDA8 O<sub>3</sub> in surface air as observed and simulated with GFDL-AM4 and GEOS-Chem, along with anomalies of stratospheric O<sub>3</sub> tracer (relative to monthly mean) in AM4 and USB O<sub>3</sub> from the two models, during the STT events on April 23 and May 13 of 2017. Note that O<sub>3</sub>Strat in this figure and Fig.9 is shown as anomalies relative to the monthly mean, while the absolute values are shown in Figs.4 and 8.

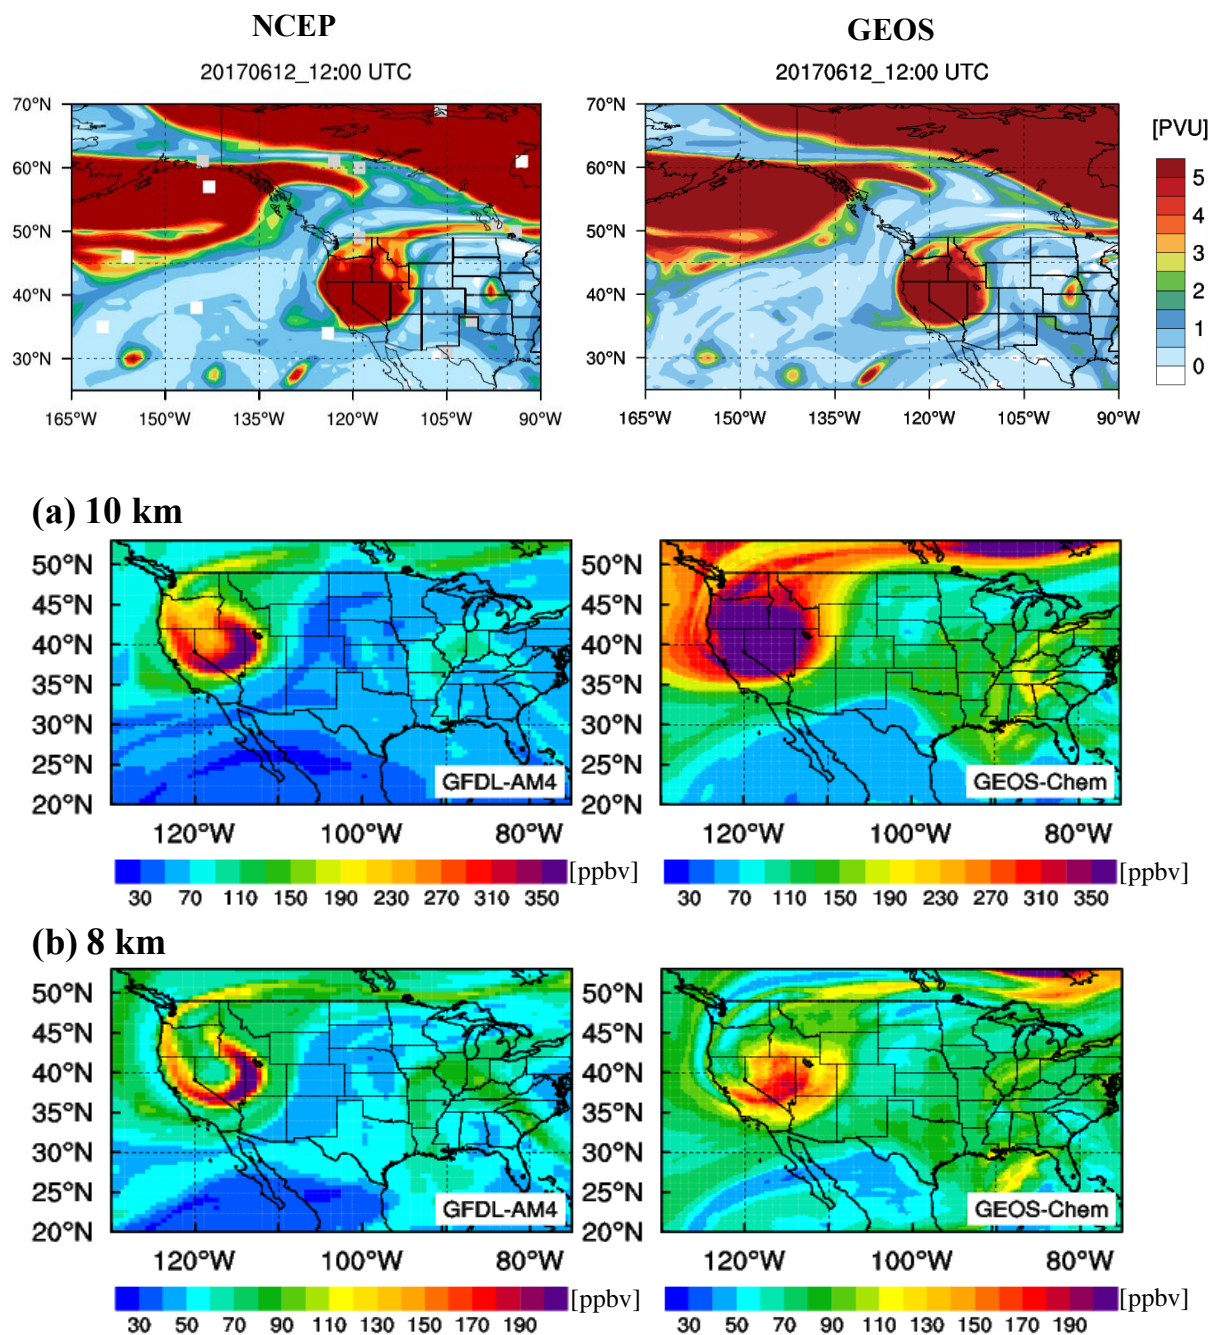

**Figure S7. Top:** Potential vorticity at 250 hPa on June 12 calculated from the reanalysis datasets used in AM4 (NCEP) and GEOS-Chem (GEOS). **Bottom:** Maps of O<sub>3</sub> levels at 10 km and 8 km altitude in GFDL-AM4 and GEOS-Chem on June 12, 2017.



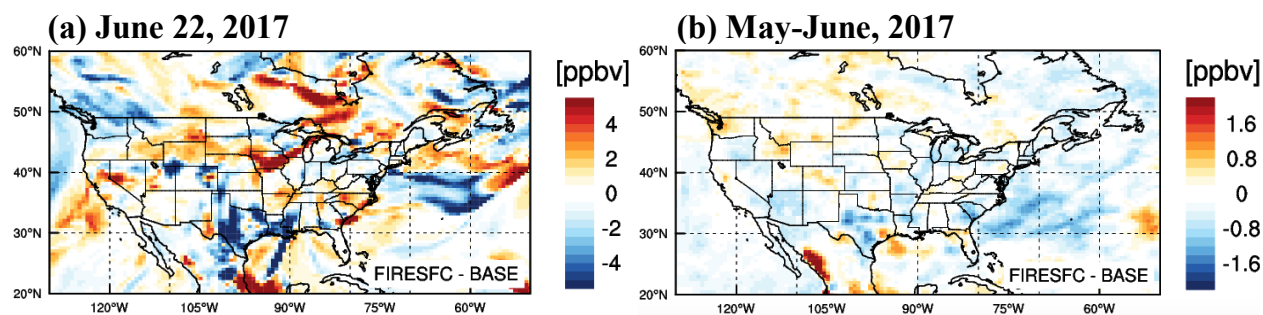

**Figure S8.** Differences in MDA8 O<sub>3</sub> between GFDL-AM4 FIRESFC (with all wildfire emissions placed at the surface) and BASE (a) on June 22, 2017 (wildfire event) and (b) during May-June, 2017 (FAST-LVOS). Simulations are at C192 (~50 km × 50 km) horizontal resolution.

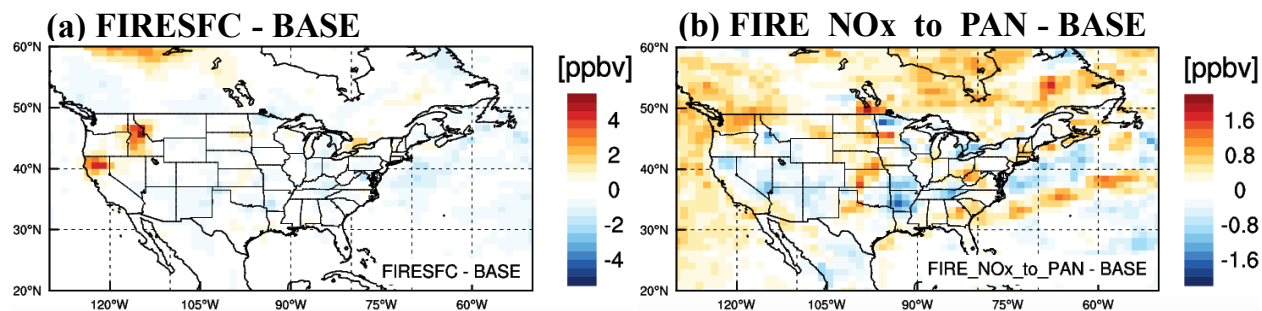

**Figure S9.** Monthly MDA8 O<sub>3</sub> differences during August, 2012 (an active wildfire season) between (a) GFDL-AM4 FIRESFC (with all wildfire emissions placed at the surface) and BASE and (b) difference between FIRE\_NO<sub>x</sub>\_to\_PAN (with 40% and 20% of wildfire NO<sub>x</sub> partitioned into PAN and HNO<sub>3</sub>, respectively) and BASE case. Simulations are at C96 (~100 km × 100 km) horizontal resolution. FIRE\_NO<sub>x</sub>\_to\_PAN simulations are only available during 2010-2016.

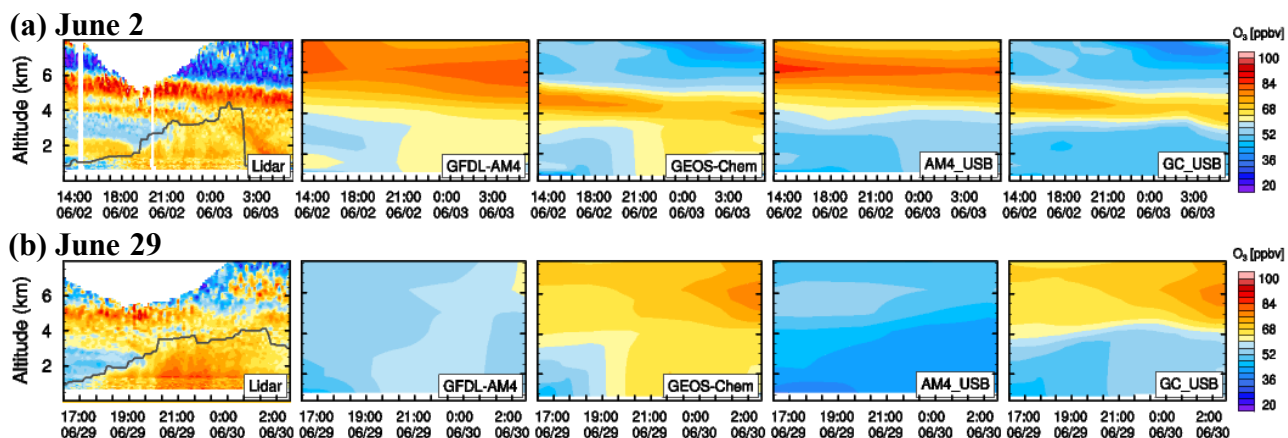

**Figure S10.** Time-height curtain plots of  $\text{O}_3$  above NLVA as observed with TOPAZ lidar and simulated with GFDL-AM4 ( $\sim 50 \times 50 \text{ km}^2$ ; interpolated from 3-hourly data) and GEOS-Chem ( $0.25^\circ \times 0.3125^\circ$ ; interpolated from hourly data) during the regional pollution events on (a) June 2 and (b) June 29, 2017 (UTC). The right panels compare USB  $\text{O}_3$  from the two models.

**June 2**

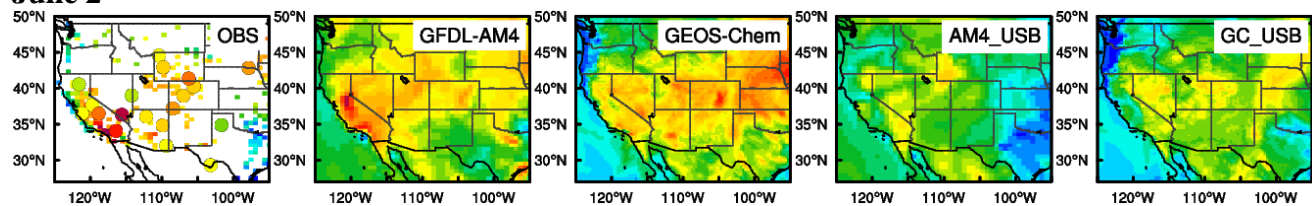

**June 29**

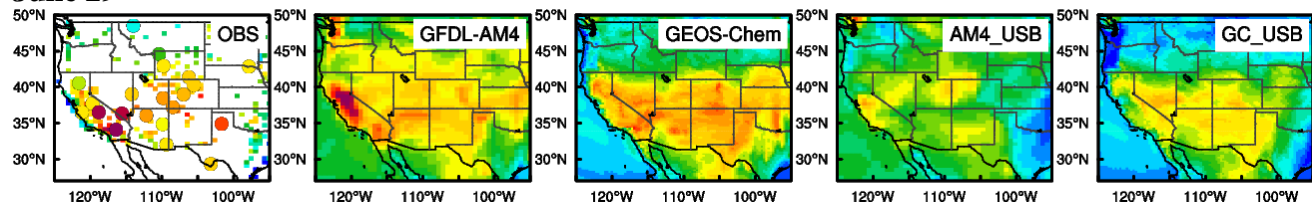

**June 30**

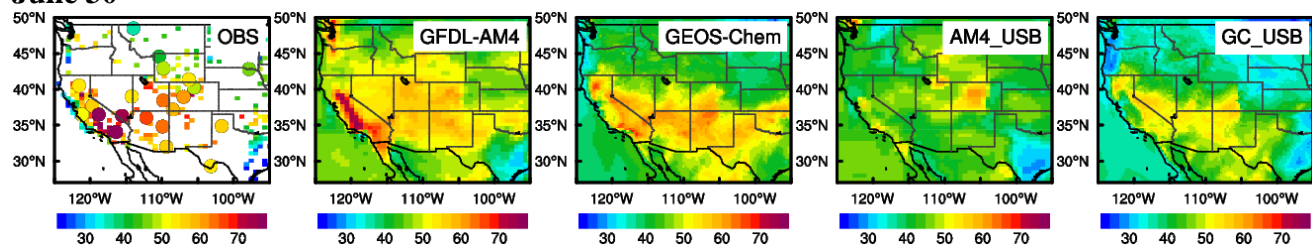

**Figure S11.** Maps of total MDA8 O<sub>3</sub> in surface air as observed and simulated with GFDL-AM4 and GEOS-Chem, along with USB O<sub>3</sub> from the two models, on June 2, June 29, and June 30.

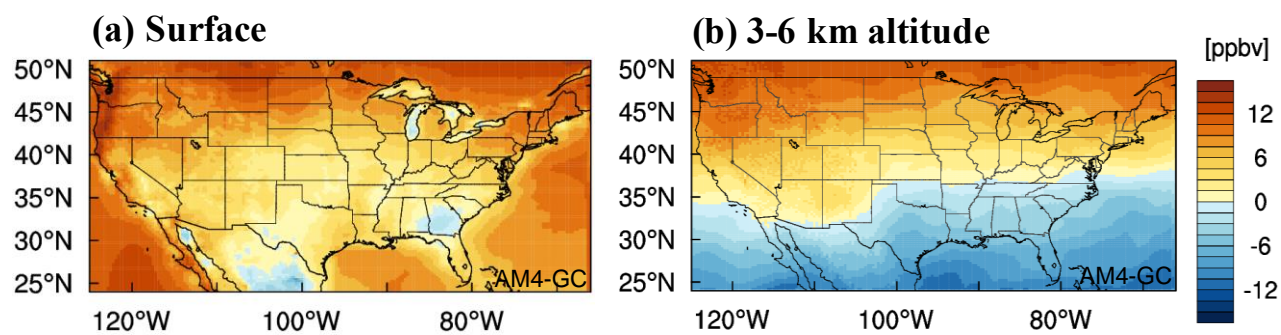

**Fig. S12.** Differences in USB O<sub>3</sub> between GFDL-AM4 and GEOS-Chem (a) at the surface (MDA8) and (b) between 3-6 km altitude (24-hour mean) during April-June, 2017.

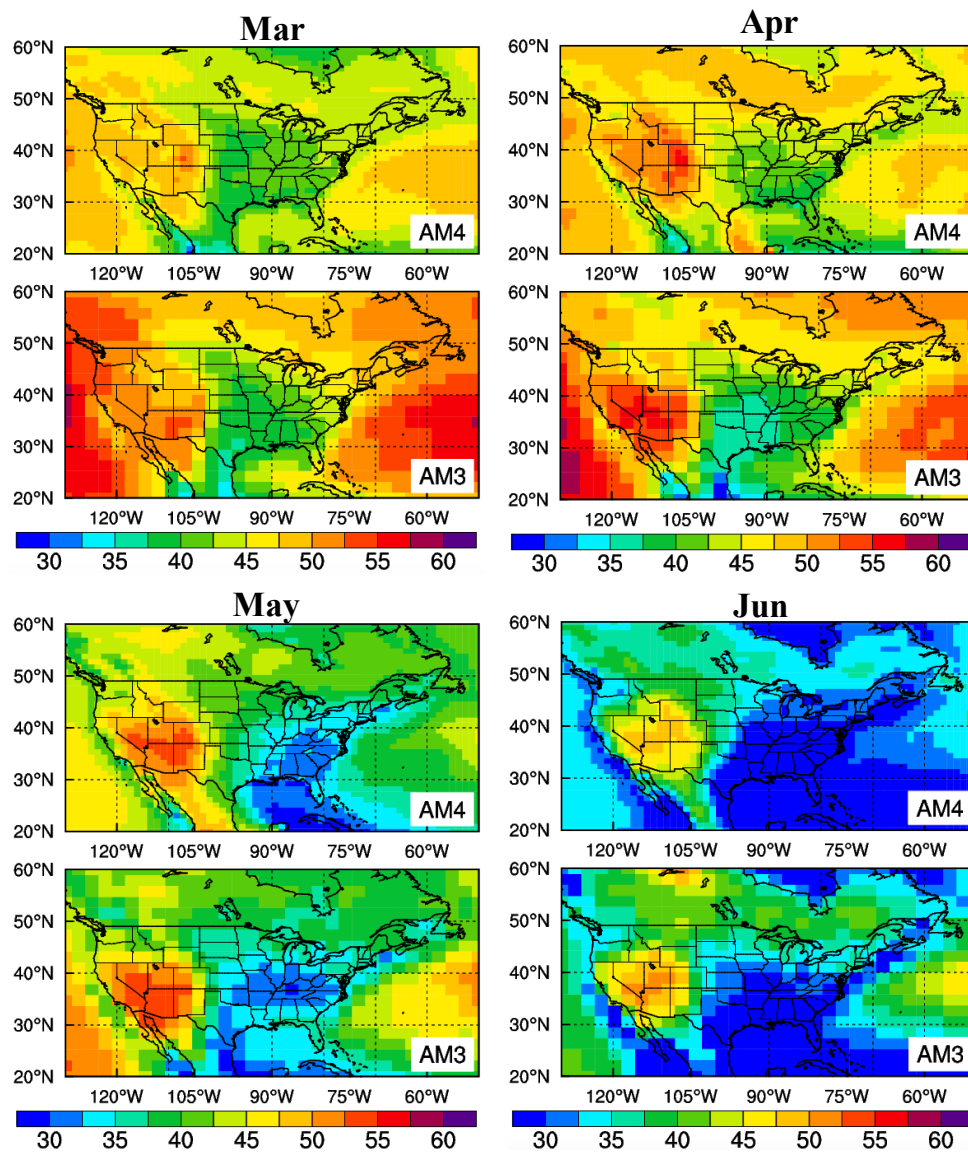

**Figure S13.** Comparison of surface NAB MDA8 O<sub>3</sub> estimates in the GFDL-AM4 model (this study) with its predecessor GFDL-AM3 (Lin et al., 2012a; Lin et al., 2017). The results are shown separately for March to June during the 2010-2014 period for which the NAB simulations are available from both models.

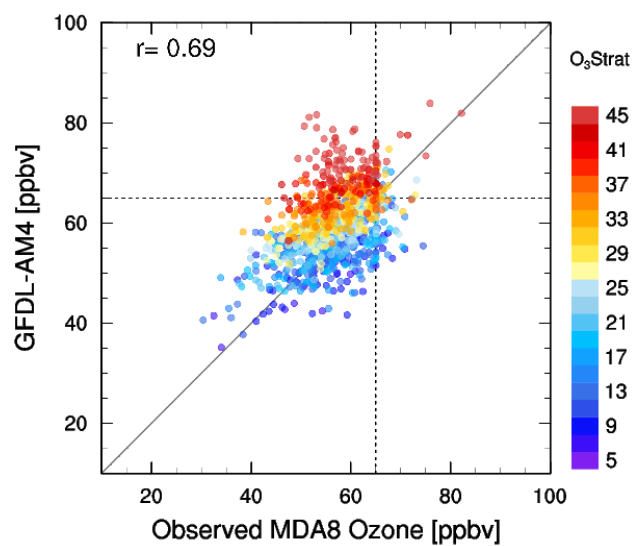

**Figure S14.** Scatter plots of observed versus simulated daily MDA8 O<sub>3</sub>, color-coded by AM4 stratospheric O<sub>3</sub> tracer (O<sub>3</sub>Strat) at 12 WUS high-elevation sites during April-June, 2017.

**Table S1.** Air quality monitoring sites in Clark County, NV and CASTNet sites in the western U.S. used in this study and statistics of model performance for MDA8 O<sub>3</sub> at these sites during April-June, 2017.

| Site ID                                                  | Site Name               | Latitude (°) | Longitude (°) | Elevation (m) | r (AM4/GC)* | MB (AM4/GC)* | NMB (AM4/GC)* | City/State          |
|----------------------------------------------------------|-------------------------|--------------|---------------|---------------|-------------|--------------|---------------|---------------------|
| <b>Clark County sites</b>                                |                         |              |               |               |             |              |               |                     |
| 32-003-0601                                              | Boulder City            | 35.98        | -114.85       | 750           | 0.57/0.87   | 5.4/-3.3     | 9.8%/-6.1%    | Boulder City, NV    |
| 32-003-0298                                              | Green Valley            | 36.05        | -115.05       | 562           | 0.60/0.86   | 5.0/-3.7     | 9.0%/-6.6%    | Henderson, NV       |
| 32-003-1019                                              | Jean                    | 35.79        | -115.36       | 924           | 0.51/0.81   | 5.5/-2.9     | 9.8%/-5.2%    | Jean, NV            |
| 32-003-0043                                              | Paul Meyer              | 36.11        | -115.25       | 736           | 0.65/0.79   | 3.1/-5.9     | 5.4%/-10.1%   | Las Vegas, NV       |
| 32-003-0071                                              | Walter Johnson          | 36.17        | -115.26       | 780           | 0.60/0.84   | 1.8/-7.2     | 3.0%/-12.1%   | Las Vegas, NV       |
| 32-003-0073                                              | Palo Verde              | 36.17        | -115.33       | 939           | 0.59/0.84   | 3.0/-5.9     | 5.2%/-10.2%   | Las Vegas, NV       |
| 32-003-0075                                              | Joe Neal                | 36.27        | -115.24       | 732           | 0.59/0.85   | 2.5/-6.5     | 4.3%/-11.1%   | Las Vegas, NV       |
| 32-003-0540                                              | Jerome Mack             | 36.14        | -115.08       | 549           | 0.59/0.83   | 8.9/-0.2     | 17.1%/-0.4%   | Las Vegas, NV       |
| 32-003-0022                                              | Apex                    | 36.39        | -114.91       | 661           | 0.58/0.88   | 5.2/-3.7     | 9.4%/-6.6%    | Apex, NV            |
| 32-003-0023                                              | Mesquite                | 36.81        | -114.06       | 488           | 0.62/0.79   | 8.5/-0.7     | 16.4%/-1.4%   | Mesquite, NV        |
| 32-003-2002                                              | JD Smith                | 36.19        | -115.12       | 569           | 0.59/0.81   | 5.2/-3.8     | 9.4%/-6.7%    | North Las Vegas, NV |
| 32-003-7772                                              | Indian Springs          | 36.57        | -115.68       | 977           | 0.71/0.74   | 5.1/-3.0     | 9.2%/-5.4%    | Indian Springs, NV  |
| 32-003-0078                                              | Arden Peak              | 35.95        | -115.04       | 1311          | 0.34/0.82   | -0.4/-5.6    | -0.7%/-9.2%   | Henderson, NV       |
| 32-003-7771                                              | SM Youth Camp           | 36.32        | -115.59       | 2569          | 0.62/0.64   | 2.4/-5.5     | 4.1%/-9.5%    | Las Vegas, NV       |
| <b>High-elevation sites (&gt;1500 m above sea level)</b> |                         |              |               |               |             |              |               |                     |
| AP                                                       | Angel Peak <sup>+</sup> | 36.32        | -115.57       | 2682          | 0.50/0.72   | -0.8/-4.6    | -1.3%/-7.5%   | Las Vegas, NV       |
| CHA467                                                   | Chiricahua NM           | 32.01        | -109.39       | 1570          | 0.59/0.77   | 2.1/-5.2     | 3.7%/-8.9%    | AZ                  |
| PET427                                                   | Petrified Forest        | 34.82        | -109.89       | 1723          | 0.52/0.78   | 3.3/-4.0     | 5.7%/-6.9%    | AZ                  |
| GRC474                                                   | Grand Canyon NP         | 36.06        | -112.18       | 2073          | 0.57/0.73   | 3.8/-5.4     | 6.7%/-9.5%    | AZ                  |
| ROM406                                                   | Rocky Mountain NP       | 40.28        | -105.55       | 2743          | 0.75/0.77   | 3.8/-2.0     | 6.8%/-3.6%    | CO                  |
| GTH161                                                   | Gothic                  | 38.96        | -106.99       | 2926          | 0.82/0.69   | 3.1/-2.3     | 5.6%/-4.0%    | CO                  |
| MEV405                                                   | Mesa Verde NP           | 37.2         | -108.49       | 2165          | 0.65/0.76   | 3.9/-3.8     | 6.9%/-6.8%    | CO                  |
| GRB411                                                   | Great Basin NP          | 39.01        | -114.22       | 2060          | 0.75/0.80   | 6.0/-5.0     | 11.2%/-9.4%   | NV                  |
| CAN407                                                   | Canyonlands NP          | 38.46        | -109.82       | 1809          | 0.61/0.74   | 4.5/-5.1     | 8.0%/-9.2%    | UT                  |
| PND165                                                   | Pinedale                | 42.93        | -109.79       | 2388          | 0.79/0.79   | 4.4/-5.4     | 8.1%/-9.9%    | WY                  |
| CNT169                                                   | Centennial              | 41.36        | -106.24       | 3178          | 0.80/0.74   | -0.2/-6.6    | -0.3%/-11.4%  | WY                  |
| YEL408                                                   | Yellowstone NP          | 44.56        | -110.4        | 2400          | 0.75/0.82   | 5.7/-4.7     | 10.9%/-8.9%   | WY                  |

\* r: day-to-day correlation coefficient between simulations and observations; MB: model mean bias; NMB: model normalized mean bias

<sup>+</sup> NOAA mobile laboratory measurements



**Table S2.** Model configurations for GFDL-AM4 and GEOS-Chem BASE simulations.

| Model                                           | GFDL-AM4                                                                                                               |            |               | GEOS-Chem                                                                                                                                                                                                                     |            |               |
|-------------------------------------------------|------------------------------------------------------------------------------------------------------------------------|------------|---------------|-------------------------------------------------------------------------------------------------------------------------------------------------------------------------------------------------------------------------------|------------|---------------|
| <b>Horizontal resolution</b>                    | C96 (~100 km ×100 km) and C192 (~50 km×50 km) (Global)                                                                 |            |               | 2°×2.5° (Global) and 0.25°×0.3125° (North America)                                                                                                                                                                            |            |               |
| <b>Vertical resolution</b>                      | 49 layers                                                                                                              |            |               | 47 layers                                                                                                                                                                                                                     |            |               |
| <b>Meteorological fields</b>                    | Chemistry-Climate model; horizontal winds (u, v) are nudged to NCEP                                                    |            |               | GEOS-FP                                                                                                                                                                                                                       |            |               |
| <b>Tropospheric chemistry</b>                   | Based on MOZART-2 (Horowitz et al., 2003; Horowitz et al., 2007)                                                       |            |               | Tropchem                                                                                                                                                                                                                      |            |               |
| <b>Stratospheric chemistry</b>                  | Interactive (Austin and Wilson, 2006; Austin et al., 2013; Lin et al., 2015)                                           |            |               | Linoz                                                                                                                                                                                                                         |            |               |
| <b>Biogenic isoprene</b>                        | MEGAN2.1 (online)                                                                                                      |            |               | MEGAN2.1 (online)                                                                                                                                                                                                             |            |               |
| <b>Lightning NOx</b>                            | Tied to model meteorological fields (Price and Rind, 1992) as described in Donner et al. (2011) and Naik et al. (2013) |            |               | Parameterized based on monthly climatology of satellite lightning observations coupled to model deep convection with a yield of 500 mol N/flash at northern mid-latitudes and 125 mol N/flash elsewhere (Murray et al., 2012) |            |               |
| <b>Anthropogenic emissions<sup>a</sup></b>      | NOx (Tg N/yr)                                                                                                          | CO (Tg/yr) | NMVOC (Tg/yr) | NOx (Tg N/yr)                                                                                                                                                                                                                 | CO (Tg/yr) | NMVOC (Tg/yr) |
| Western U.S. <sup>b</sup>                       | 1.3                                                                                                                    | 17.8       | 4.4           | 2.0                                                                                                                                                                                                                           | 21.0       | 4.3           |
| Eastern U.S. <sup>c</sup>                       | 1.0                                                                                                                    | 24.1       | 6.6           | 1.5                                                                                                                                                                                                                           | 28.5       | 6.4           |
| China                                           | 6.6                                                                                                                    | 185.2      | 29.4          | 8.8                                                                                                                                                                                                                           | 170.9      | 28.7          |
| European Union                                  | 2.6                                                                                                                    | 22.3       | 6.2           | 3.5                                                                                                                                                                                                                           | 17.9       | 8.5           |
| <b>Wildfire emissions (Apr-Jun)<sup>a</sup></b> | NOx (Tg N)                                                                                                             | CO (Tg)    | NMVOC (Tg)    | NOx (Tg N)                                                                                                                                                                                                                    | CO (Tg)    | NMVOC (Tg)    |
| Western U.S. <sup>b</sup>                       | 0.013                                                                                                                  | 0.615      | 0.113         | 0.013                                                                                                                                                                                                                         | 0.615      | 0.122         |
| Eastern U.S. <sup>c</sup>                       | 0.010                                                                                                                  | 0.614      | 0.125         | 0.010                                                                                                                                                                                                                         | 0.614      | 0.135         |
| China <sup>d</sup>                              | 0.068                                                                                                                  | 3.400      | 0.652         | 0.068                                                                                                                                                                                                                         | 3.400      | 0.704         |
| European Union                                  | 0.012                                                                                                                  | 0.606      | 0.116         | 0.012                                                                                                                                                                                                                         | 0.606      | 0.124         |

<sup>a</sup>See section 2.3 in the main article for the details of anthropogenic and fire emissions datasets used in this study.<sup>b</sup>Western U.S.: 125-94.5°W;<sup>c</sup>Eastern U.S.: 94.5-60°W;

**Table S3.** List of GFDL-AM4 and GEOS-Chem model simulations

| <b>Case</b>          | <b>Simulation period</b> | <b>Emissions</b>                                                                              |
|----------------------|--------------------------|-----------------------------------------------------------------------------------------------|
| <b>GFDL-AM4</b>      |                          |                                                                                               |
| <b>C96_BASE</b>      | Jan 2010- Jun 2017       | All anthropogenic emissions turned on (Section 2.3); daily fire emissions from FINN           |
| <b>C96_USB</b>       | Jan 2010- Jun 2017       | Same as BASE with U.S. anthropogenic emissions turned off                                     |
| <b>C96_zeroAsia</b>  | Jan 2010- Jun 2017       | Same as BASE with Asian anthropogenic emissions turned off                                    |
| <b>C96_zeroFire</b>  | Jan 2010- Jun 2017       | Fire emissions turned off                                                                     |
| <b>C192_BASE</b>     | Jan- Jun 2017            | Same as C96_BASE                                                                              |
| <b>C192_USB</b>      | Jan- Jun 2017            | Same as C96_USB                                                                               |
| <b>C192_zeroAsia</b> | Jan- Jun 2017            | Same as C96_zeroAsia                                                                          |
| <b>C192_zeroFire</b> | Jan- Jun 2017            | Same as C96_zeroFire                                                                          |
| <b>GEOS-Chem</b>     |                          |                                                                                               |
| <b>GC_Global</b>     | Jan-Jun 2017             | All anthropogenic emissions turned on (Section 2.3); daily fire emissions from FINN           |
| <b>GC_Global_USB</b> | Jan-Jun 2017             | Same as GC_Global, but with U.S. anthropogenic emissions turned off                           |
| <b>GC_NA</b>         | Feb-Jun 2017             | Nested simulations over North America with initial and boundary conditions from GC_Global     |
| <b>GC_NA_USB</b>     | Feb-Jun 2017             | Nested simulations over North America with initial and boundary conditions from GC_Global_USB |

**Table S4.** Statistics of model performance for MDA8 O<sub>3</sub> in GFDL-AM4 (AM4) and GEOS-Chem (GC) at Clark County (CC) air quality monitoring sites and western U.S. CASTNet (CN) sites during each high-O<sub>3</sub> episode analyzed in this study (locations of the sites are shown in Fig. 1). MB represents model mean bias and R denotes spatial correlation coefficient between simulations and observations.

| Events                                                          | OBS<br>(CC/CN) | AM4<br>(CC/CN) | GC<br>(CC/CN) | MB_AM4<br>(CC/CN) | MB_GC<br>(CC/CN) | r_AM4<br>(CN) | r_GC<br>(CN) |
|-----------------------------------------------------------------|----------------|----------------|---------------|-------------------|------------------|---------------|--------------|
| <b>Stratospheric intrusions</b>                                 |                |                |               |                   |                  |               |              |
| April 22-23                                                     | 58.9/64.1      | 63.9/67.2      | 51.3/55.8     | 5.0/3.1           | -7.5/-8.4        | 0.7           | 0.9          |
| May 13-14                                                       | 63.7/61.0      | 69.1/62.2      | 55.2/54.9     | 5.4/1.2           | -8.4/-6.1        | -0.5          | 0.8          |
| June 11-13                                                      | 53.3/55.2      | 62.4/62.1      | 48.2/48.5     | 9.2/6.9           | -5.1/-6.7        | 0.8           | 0.9          |
| <b>Combined stratospheric and regional pollution influences</b> |                |                |               |                   |                  |               |              |
| June 14                                                         | 64.8/56.6      | 68.1/62.4      | 56.7/52.9     | 3.4/5.8           | -8.1/-3.7        | 0.9           | 0.9          |
| <b>Wildfires</b>                                                |                |                |               |                   |                  |               |              |
| June 22                                                         | 66.7/57.4      | 55.5/58.0      | 70.5/58.5     | -11.2/0.5         | 3.7/1.1          | 0.6           | 0.7          |
| <b>Regional/local pollution events</b>                          |                |                |               |                   |                  |               |              |
| June 2                                                          | 60.7/57.1      | 59.3/53.8      | 58.8/55.1     | -1.4/-3.4         | -1.9/-2.1        | 0.6           | 0.9          |
| June 16                                                         | 67.1/53.8      | 65.4/55.5      | 66.7/53.2     | -0.5/1.6          | 3.8/-0.7         | 0.9           | 0.9          |
| June 29-30                                                      | 66.2/57.1      | 56.2/54.8      | 62.3/53.6     | -10.0/-2.2        | -3.9/-3.5        | 0.7           | 0.9          |
| <b>Long-range transport of Asian pollution</b>                  |                |                |               |                   |                  |               |              |
| May 24                                                          | 62.9/56.1      | 62.4/60.3      | 66.7/54.5     | -0.5/4.3          | 3.8/-1.5         | 0.7           | 0.7          |
| <b>Unattributed event</b>                                       |                |                |               |                   |                  |               |              |
| June 28                                                         | 66.3/55.9      | 53.8/52.8      | 60.3/55.6     | -12.5/-3.1        | -5.9/-0.3        | 0.6           | 0.8          |

**Table S5.** Interannual variability of May-June mean MDA8 O<sub>3</sub> from observations and GFDL-AM4 BASE simulations (C96\_BASE; Table S3) at 14 Clark County air quality monitoring sites during 2010-2017, along with model-estimated contributions from U.S. background (USB), North American Background (NAB), stratosphere-to-troposphere transport (O<sub>3</sub>Strat), long-range transport of Asian pollution (ASIA), and wildfires (FIRE).

| <b>May-Jun</b>   | <b>OBS</b> | <b>BASE</b> | <b>USB</b> | <b>NAB</b> | <b>O<sub>3</sub>Strat</b> | <b>ASIA</b> | <b>FIRE</b> |
|------------------|------------|-------------|------------|------------|---------------------------|-------------|-------------|
| <b>2010</b>      | 58.2       | 63.2        | 52.6       | 48.9       | 20.5                      | 4.7         | 2.3         |
| <b>2011</b>      | 60.6       | 65.3        | 54.1       | 50.9       | 22.0                      | 5.7         | 3.4         |
| <b>2012</b>      | 64.3       | 65.7        | 55.3       | 51.6       | 20.4                      | 4.2         | 2.7         |
| <b>2013</b>      | 61.2       | 63.7        | 53.7       | 50.7       | 20.4                      | 4.6         | 2.5         |
| <b>2014</b>      | 59.2       | 61.8        | 51.5       | 47.4       | 18.4                      | 4.3         | 1.4         |
| <b>2015</b>      | 59.3       | 63.9        | 51.8       | 46.6       | 16.5                      | 3.3         | 1.5         |
| <b>2016</b>      | 56.4       | 60.7        | 48.9       | 44.3       | 14.9                      | 3.8         | 1.8         |
| <b>2017</b>      | 57.0       | 61.7        | 50.9       | 46.8       | 17.9                      | 4.2         | 2.2         |
| <b>Mean±s.d.</b> | 59.5±2.5   | 63.2±1.8    | 52.3±2.0   | 48.4±2.6   | 18.9±2.4                  | 4.4±0.7     | 2.2±0.7     |

**Table S6.** Percentage of site-days with MDA8 O<sub>3</sub> greater than 70 ppbv or 65 ppbv at air quality monitoring sites in Clark County and at CASTNet sites from observations (OBS), GFDL-AM4 (AM4) and GEOS-Chem (GC) simulations during April-June of 2010-2017. See Table S1 for the locations of sites.

| Clark County sites | > 70 ppbv |           |      | > 65 ppbv  |            |      |
|--------------------|-----------|-----------|------|------------|------------|------|
|                    | OBS       | AM4       | GC   | OBS        | AM4        | GC   |
| 2010               | 4.1%      | 8.2%      | /    | 15.5%      | 32.7%      | /    |
| 2011               | 9.8%      | 15.4%     | /    | 23.5%      | 39.8%      | /    |
| 2012               | 15.6%     | 20.2%     | /    | 31.0%      | 45.6%      | /    |
| 2013               | 9.2%      | 9.5%      | /    | 24.6%      | 41.8%      | /    |
| 2014               | 5.6%      | 6.8%      | /    | 14.3%      | 25.8%      | /    |
| 2015               | 4.9%      | 10.3%     | /    | 16.1%      | 37.6%      | /    |
| 2016               | 1.9%      | 4.0%      | /    | 8.8%       | 28.8%      | /    |
| 2017               | 2.4%      | 4.6%      | 1.3% | 10.8%      | 22.0%      | 6.1% |
| <b>Mean±s.d.</b>   | 6.7%±4.6% | 9.9%±5.5% | /    | 18.1%±7.6% | 34.3%±8.3% | /    |
| CASTNet sites      | OBS       | AM4       | GC   | OBS        | AM4        | GC   |
|                    | OBS       | AM4       | GC   | OBS        | AM4        | GC   |
| 2010               | 2.8%      | 6.5%      | /    | 10.8%      | 23.0%      | /    |
| 2011               | 6.7%      | 7.7%      | /    | 17.5%      | 27.2%      | /    |
| 2012               | 9.4%      | 7.7%      | /    | 24.2%      | 33.4%      | /    |
| 2013               | 1.8%      | 3.5%      | /    | 10.0%      | 17.0%      | /    |
| 2014               | 1.1%      | 0.7%      | /    | 5.0%       | 8.4%       | /    |
| 2015               | 1.3%      | 2.2%      | /    | 5.0%       | 16.4%      | /    |
| 2016               | 0.4%      | 1.3%      | /    | 3.3%       | 12.6%      | /    |
| 2017               | 0.9%      | 2.0%      | 0.1% | 4.6%       | 15.5%      | 1.3% |
| <b>Mean±s.d.</b>   | 3.1%±3.2% | 4.0%±2.9% | /    | 10.1%±7.4% | 19.2%±8.2% | /    |

## References

- Austin, J., and Wilson, R. J.: Ensemble simulations of the decline and recovery of stratospheric ozone, *J. Geophys. Res.-Atmos.*, 111, <https://doi.org/10.1029/2005JD006907>, 2006.
- Austin, J., Horowitz, L. W., Schwarzkopf, M. D., Wilson, R. J., and Levy II, H.: Stratospheric Ozone and Temperature Simulated from the Preindustrial Era to the Present Day, *J. Climate*, 26, 3528-3543, <https://doi.org/10.1175/jcli-d-12-00162.1>, 2013.
- Donner, L. J., Wyman, B. L., Hemler, R. S., Horowitz, L. W., Ming, Y., Zhao, M., Golaz, J.-C., Ginoux, P., Lin, S.-J., Schwarzkopf, M. D., Austin, J., Alaka, G., Cooke, W. F., Delworth, T. L., Freidenreich, S. M., Gordon, C. T., Griffies, S. M., Held, I. M., Hurlin, W. J., Klein, S. A., Knutson, T. R., Langenhorst, A. R., Lee, H.-C., Lin, Y., Magi, B. I., Malyshev, S. L., Milly, P. C. D., Naik, V., Nath, M. J., Pincus, R., Ploshay, J. J., Ramaswamy, V., Seman, C. J., Shevliakova, E., Sirutis, J. J., Stern, W. F., Stouffer, R. J., Wilson, R. J., Winton, M., Wittenberg, A. T., and Zeng, F.: The Dynamical Core, Physical Parameterizations, and Basic Simulation Characteristics of the Atmospheric Component AM3 of the GFDL Global

- Coupled Model CM3, *J. Climate*, 24, 3484-3519, <https://doi.org/10.1175/2011jcli3955.1>, 2011.
- Horowitz, L. W., Walters, S., Mauzerall, D. L., Emmons, L. K., Rasch, P. J., Granier, C., Tie, X., Lamarque, J.-F., Schultz, M. G., Tyndall, G. S., Orlando, J. J., and Brasseur, G. P.: A global simulation of tropospheric ozone and related tracers: Description and evaluation of MOZART, version 2, *J. Geophys. Res.-Atmos.*, 108, <https://doi.org/10.1029/2002JD002853>, 2003.
- Horowitz, L. W., Fiore, A. M., Milly, G. P., Cohen, R. C., Perring, A., Wooldridge, P. J., Hess, P. G., Emmons, L. K., and Lamarque, J.-F.: Observational constraints on the chemistry of isoprene nitrates over the eastern United States, *J. Geophys. Res.-Atmos.*, 112, <https://doi.org/10.1029/2006JD007747>, 2007.
- Lin, J.-T., and McElroy, M. B.: Impacts of boundary layer mixing on pollutant vertical profiles in the lower troposphere: Implications to satellite remote sensing, *Atmos. Environ.*, 44, 1726-1739, <https://doi.org/10.1016/j.atmosenv.2010.02.009>, 2010.
- Murray, L. T., Jacob, D. J., Logan, J. A., Hudman, R. C., and Koshak, W. J.: Optimized regional and interannual variability of lightning in a global chemical transport model constrained by LIS/OTD satellite data, *J. Geophys. Res.-Atmos.*, 117, <https://doi.org/10.1029/2012jd017934>, 2012.
- Naik, V., Horowitz, L. W., Fiore, A. M., Ginoux, P., Mao, J., Aghedo, A. M., and Levy II, H.: Impact of preindustrial to present-day changes in short-lived pollutant emissions on atmospheric composition and climate forcing, *J. Geophys. Res.-Atmos.*, 118, 8086-8110, <https://doi.org/10.1002/jgrd.50608>, 2013.
- Price, C., and Rind, D.: A simple lightning parameterization for calculating global lightning distributions, *J. Geophys. Res.-Atmos.*, 97, 9919-9933, <https://doi.org/10.1029/92JD00719>, 1992.
